# Supplementary material for: Two-color, rolling-circle amplification on antibody microarrays for sensitive, multiplexed serum-protein measurements
Source: Springer Nature journal article supplement (doi:10.1186/gb-2004-5-4-r28), 2004-03-30
Supplement: Additional file 13 [file gb-2004-5-4-r28-s13.doc]

**Sequences used in Zhou et al., Genome Biology 2004**

**Primer 1:**

5’-CAC AGC TGA GGA TAG GAC AT-3’

Circle 1:

| pCTCAGCTGTGTAACAACATGAAGATTGTAGGTCAGAACTCAC |
| --- |
| CTGTTAGAAACTGTGAAGATCGCTTATTATGTCCTATC-3’ |

**Decorator 1:**

5’-Cy3-TGT CCT ATC CTC AGC TGG-3’

**Primer 4.2:**

5’-TGT CTC AGT AGC TCG TCA GT-3’

Circle 4.2:

| pACTGACGAGCTACTGAGACATGTACAATCGGACCTGTGAGGT |
| --- |
| ACTACCCTAATCGGACCTGTGAGGTACTACCCTAACTT-3’ |

**Decorator 4.2:**

5’-Cy3-GAC GAG CTA CTG AGA CAT GTA C-3’
